# Supplementary material for: Candidate genes that have facilitated freshwater adaptation by palaemonid prawns in the genus Macrobrachium: identification and expression validation in a model species (M. koombooloomba)
Source: PubMed Central journal article supplement (PMC5301973; doi:10.7717/peerj.2977), 2017-02-08
Supplement: peerj-05-2977-s001.pdf [file peerj-05-2977-s001.pdf]

**Table S1:** Key candidate genes involved with osmoregulation in prawns and other aquatic crustacean species.

| Gene Name                                                              | Functions and Mechanisms                                                                                                                                     | Species Studied                                                                                                            |
|------------------------------------------------------------------------|--------------------------------------------------------------------------------------------------------------------------------------------------------------|----------------------------------------------------------------------------------------------------------------------------|
| Na <sup>+</sup> /K <sup>+</sup> - ATPase (NKA)                         | The most important (master) gene for osmoregulation, exchange ions depending on external medium, establish electromechanical gradients across gill membranes | Crayfish (Ali et al., 2015), <i>M. amazonicum</i> (Faleiros et al., 2010), <i>M. australiense</i> (Moshtaghi et al., 2016) |
| V type (H <sup>+</sup> ) ATPase (VAT)                                  | Drives osmoregulation in dilute/extreme freshwater medium, pump protons for overall ion exchange                                                             | <i>M. amazonicum</i> (Faleiros et al., 2010), <i>M. australiense</i> (Moshtaghi et al. 2016)                               |
| Na <sup>+</sup> /K <sup>+</sup> /2Cl <sup>-</sup> cotransporter (NKCC) | Ion transportation into gill cells either from the blood or environment depending on salinity of external medium                                             | <i>M. australiense</i> (Moshtaghi et al., 2016), Crayfish (Ali et al., 2015)                                               |
| Carbonic Anhydrase (CA)                                                | Produce H <sup>+</sup> & HCO <sub>3</sub> <sup>-</sup> to drive Na <sup>+</sup> & Cl <sup>-</sup> exchange                                                   | <i>M. australiense</i> (Moshtaghi et al. 2016)                                                                             |
| Alkaline Phosphatase                                                   | Ion precipitation, support Ca <sup>+2</sup> - ATPase for calcification                                                                                       | Mud crab (Tongsaijing et al., 2013)                                                                                        |
| Arginine Kinase                                                        | Support ion transport and partial role in salinity regulation                                                                                                | <i>M. australiense</i> (Moshtaghi et al. 2016)                                                                             |
| Calreticulin                                                           | Signal transduction, Ca <sup>+2</sup> homeostasis, salinity stress biomarker, oxidative stress response and molecular chaperon                               | <i>M. rosenbergii</i> (Barman et al., 2012), crayfish (Ali et al., 2015)                                                   |
| CFT Regulator                                                          | Cl <sup>-</sup> channel regulator for euryhaline animals                                                                                                     | Crayfish (Havird et al., 2013)                                                                                             |
| ABC (ATP-binding cassette) C12 protein                                 | Participate in ion channel regulation and osmoregulatory pathway, significant role in salinity adaptation in gill                                            | <i>M. rosenbergii</i> (Barman et al., 2012)                                                                                |
| Ca <sup>+2</sup> - ATPase                                              | Ca <sup>+2</sup> transport & exchange, calcification, Ca <sup>+2</sup> homeostasis                                                                           | Crayfish (Gao and Wheatley, 2004)                                                                                          |
| Na <sup>+</sup> /H <sup>+</sup> exchanger                              | Exchange of Na <sup>+</sup> for H <sup>+</sup> or vice versa, cell volume regulation                                                                         | <i>M. amazonicum</i> (Faleiros et al., 2010)                                                                               |
| Na <sup>+</sup> /HCO <sub>3</sub> <sup>-</sup> cotransporter           | Transport HCO <sub>3</sub> <sup>-</sup> and exchange HCO <sub>3</sub> <sup>-</sup> for Na <sup>+</sup>                                                       | Green crab (Havird et al., 2013)                                                                                           |
| H <sup>+</sup> /Cl <sup>-</sup> exchanger                              | Exchange of H <sup>+</sup> for Cl <sup>-</sup> or vice versa depending on salinity                                                                           | Crab (Genovese et al., 2013)                                                                                               |
| Na <sup>+</sup> /Ca <sup>+2</sup> exchanger                            | Remove Ca <sup>+2</sup> from cell and uptake Na <sup>+</sup> from environment                                                                                | Crayfish (Gao and Wheatley, 2004)                                                                                          |
| Ca <sup>+2</sup> activated K <sup>+</sup> channel                      | Signal transduction for Ca <sup>+2</sup> transport and other cations                                                                                         | Lobster (Berkefeld et al., 2010)                                                                                           |
| Ca <sup>+2</sup> Cl <sup>-</sup> channel regulator                     | Exchange of 1 Ca <sup>+2</sup> for 2 Cl <sup>-</sup> for ion regulation                                                                                      | Crayfish (Havird et al., 2013)                                                                                             |
| Cl <sup>-</sup> transporter                                            | Transportation of Cl <sup>-</sup>                                                                                                                            | Crayfish (Havird et al., 2013)                                                                                             |
| Cl <sup>-</sup> /HCO <sub>3</sub> <sup>-</sup> exchanger               | Catalyze HCO <sub>3</sub> <sup>-</sup> from inside the cell for Cl <sup>-</sup> outside the cell                                                             | <i>M. australiense</i> (Moshtaghi et al. 2016)                                                                             |
| Mg <sup>+2</sup> transporter                                           | Mg <sup>+2</sup> transport across cell membrane & signal transduction                                                                                        | Crab (Leite and Zanotto, 2013)                                                                                             |
| K <sup>+</sup> Cl <sup>-</sup> symporter                               | Transport K <sup>+</sup> & Cl <sup>-</sup> ions, maintain electrochemical balance                                                                            | <i>P. monodon</i> (Pongsomboon et al., 2009)                                                                               |
| Integrin                                                               | Supporting role to control homeostasis for salinity stress                                                                                                   | <i>M. rosenbergii</i> (Barman et al., 2012)                                                                                |
| Claudin 3                                                              | Maintain epithelial permeability, sensing osmotic stress                                                                                                     | Freshwater crab (Furriel et al., 2010)                                                                                     |
| Aquaporin 3                                                            | Regulate cell volume caused by osmotic stress                                                                                                                | <i>M. australiense</i> (Moshtaghi et al. 2016)                                                                             |
| P38 MAP kinase                                                         | Signal transduction for stress response to osmotic balance                                                                                                   | <i>M. rosenbergii</i> (Barman et al., 2012)                                                                                |
| Osmotic Stress transcription 1                                         | Signal transduction during osmotic stress                                                                                                                    | <i>M. rosenbergii</i> (Barman et al., 2012)                                                                                |
| Mitochondrial carrier protein                                          | Osmoregulatory signal transduction                                                                                                                           | Crab (Genovese et al., 2005)                                                                                               |
| Selenophosphate 1 (SPS1)                                               | Tolerance of oxidative and salinity fluctuation stresses                                                                                                     | <i>M. rosenbergii</i> (Barman et al., 2012)                                                                                |
| ILF2 (interleukin enhancer binding factor 2)                           | A transcriptional regulator involved in the physiological process of euryhalinity                                                                            | <i>M. australiense</i> (Moshtaghi et al. 2016)<br><i>M. rosenbergii</i> (Barman et al., 2012)                              |
