# Supplementary material for: Candidate genes that have facilitated freshwater adaptation by palaemonid prawns in the genus Macrobrachium: identification and expression validation in a model species (M. koombooloomba)
Source: PubMed Central journal article supplement (PMC5301973; doi:10.7717/peerj.2977), 2017-02-08
Supplement: peerj-05-2977-s002.pdf [file peerj-05-2977-s002.pdf]

**Table S2:** Top 20 transcripts expressed at different stages in *M. koombooloomba*.

| Post Larvae   |                                  |         | Juvenile      |                                  |         | Adult         |                                  |         |
|---------------|----------------------------------|---------|---------------|----------------------------------|---------|---------------|----------------------------------|---------|
| Transcript ID | Description                      | TPM     | Transcript ID | Description                      | TPM     | Transcript ID | Description                      | TPM     |
| c898_g2_i1    | Ribosomal gene                   | 156,729 | c898_g2_i1    | Ribosomal gene                   | 198,613 | c898_g2_i1    | Ribosomal gene                   | 147,463 |
| c67584_g2_i1  | $\alpha$ -Hemocyanin             | 15,104  | c56075_g1_i1  | Cysteine                         | 15,968  | c55870_g1_i1  | Claw keratin protein             | 21,368  |
| c32579_g1_i1  | Male reproductive                | 11,658  | c55019_g2_i1  | Cystinosin homolog               | 13,714  | c62394_g3_i1  | Cuticle proprotein               | 14,932  |
| c67933_g2_i1  | Actin                            | 10,956  | c67811_g1_i1  | Opsin                            | 13,210  | c56075_g1_i1  | Cysteine                         | 12,886  |
| c56365_g1_i1  | Myosin light chain               | 10,300  | c898_g1_i1    | NADH 1                           | 11,101  | c61841_g2_i1  | Calcification peptide            | 12,107  |
| c62482_g3_i1  | Cathepsin I                      | 9,860   | c54442_g1_i1  | Hypothetical protein             | 10,990  | c57061_g1_i1  | Unidentified protein             | 10,334  |
| c61841_g2_i1  | Calcification peptide            | 9,418   | c60131_g1_i1  | Mitochondrial carrier            | 10,575  | c55019_g2_i1  | Cystinosin homolog               | 10,038  |
| c56075_g1_i1  | Cysteine                         | 9,358   | c50494_g1_i1  | Neuron protein                   | 10,433  | c54442_g1_i1  | Hypothetical protein             | 9,711   |
| c84130_g1_i1  | Cuticle protein                  | 9,222   | c55019_g1_i1  | $\alpha$ -ATP synthase           | 9,115   | c54430_g2_i1  | Antisense protein                | 9,509   |
| c55019_g2_i1  | Cystinosin homolog               | 8,333   | c57643_g1_i1  | Antisense protein                | 8,372   | c60131_g1_i1  | Mitochondrial carrier            | 8,643   |
| c55034_g2_i1  | Growth protein                   | 8,130   | c92391_g1_i1  | Cystisolic protein               | 7,833   | c47187_g1_i1  | Ca <sup>+2</sup> binding protein | 8,103   |
| c47187_g1_i1  | Ca <sup>+2</sup> binding protein | 7,979   | c62348_g3_i1  | $\alpha$ -Elongation factor      | 7,594   | c55019_g1_i1  | $\alpha$ -ATP synthase           | 8066    |
| c54442_g1_i1  | Hypothetical protein             | 7,777   | c108471_g1_i1 | NADH dehydrogenase               | 7,084   | c67811_g1_i1  | Opsin                            | 7428    |
| c60131_g1_i1  | Mitochondrial carrier            | 7,536   | c47187_g1_i1  | Ca <sup>+2</sup> binding protein | 6,535   | c67933_g2_i1  | Actin                            | 7266    |
| c61308_g2_i1  | Growth arrest protein            | 7,367   | c67933_g2_i1  | Actin                            | 6,504   | c50361_g2_i1  | Unidentified protein             | 7,262   |
| c55870_g1_i1  | Claw keratin protein             | 7,281   | c62464_g1_i1  | $\beta$ -ATP synthase            | 5,356   | c50494_g1_i1  | Neuron protein                   | 7,254   |
| c55019_g1_i1  | $\alpha$ -ATP synthase           | 6,576   | c61841_g2_i1  | Calcification peptide            | 5,337   | c84130_g1_i1  | Cuticle protein                  | 7,107   |
| c67686_g1_i1  | $\gamma$ -Hemocyanin             | 6,456   | c65211_g11_i1 | NADH 4                           | 5,174   | c64955_g2_i2  | Arthrodial protein               | 6,799   |
| c108471_g1_i1 | NADH dehydrogenase               | 6,104   | c50361_g2_i1  | Unidentified protein             | 4,948   | c898_g1_i1    | NADH 1                           | 6,743   |
| c50494_g1_i1  | Neuron protein                   | 6,098   | c65211_g1_i1  | NADH 6                           | 4,709   | c62396_g1_i1  | Oocyte finger protein            | 6,080   |
