# Supplementary material for: Candidate genes that have facilitated freshwater adaptation by palaemonid prawns in the genus Macrobrachium: identification and expression validation in a model species (M. koombooloomba)
Source: PubMed Central journal article supplement (PMC5301973; doi:10.7717/peerj.2977), 2017-02-08
Supplement: peerj-05-2977-s003.pdf [file peerj-05-2977-s003.pdf]

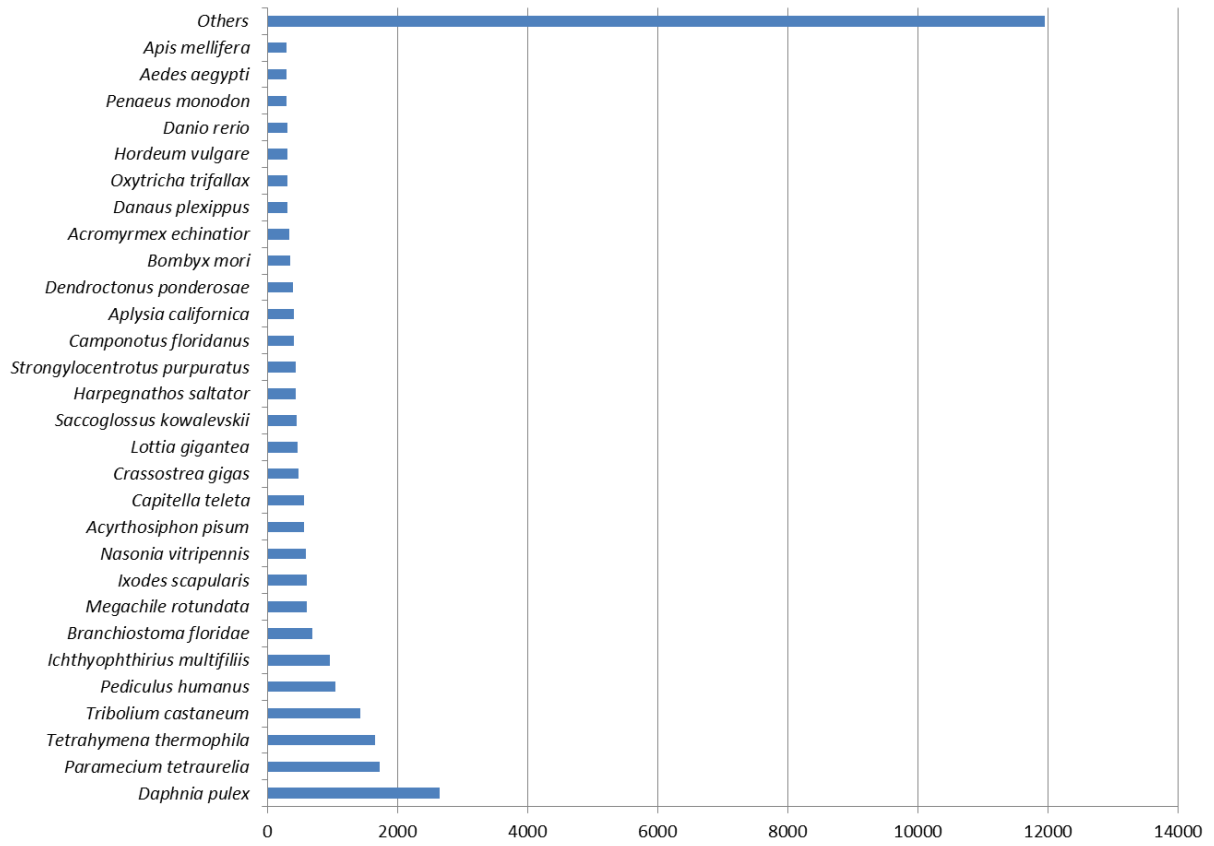

**Figure S1:** Top hit species distribution chart. X-axis represents the number of blast matches while Y-axis shows the name of different species.
