# Supplementary material for: Candidate genes that have facilitated freshwater adaptation by palaemonid prawns in the genusMacrobrachium: identification and expression validation in a model species (M. koombooloomba)
Source: PeerJ journal article supplement (doi:10.7717/peerj.2977), 2017-02-08
Supplement: Supplemental_Figure_2.pdf [file Supplemental_Figure_2.pdf]

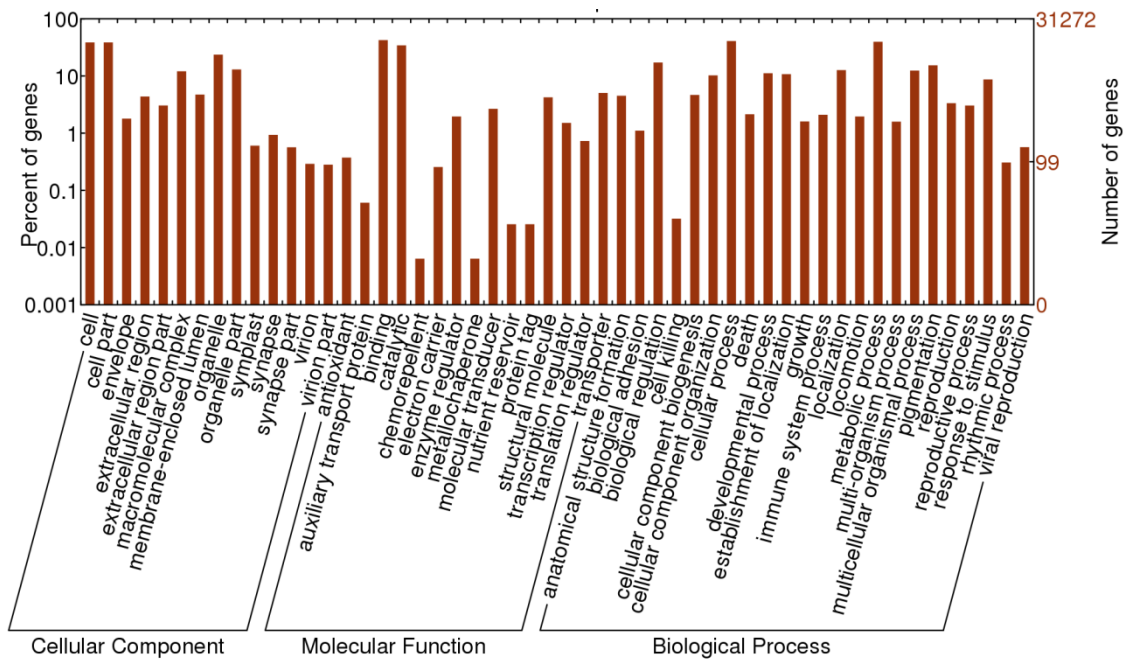

**Figure S2:** WEGO plot showing number and percentage of genes involved with different functions.
